# Supplementary material for: Self-adaptive high-temperature gels with long-lasting underwater stability for environmentally tolerant flexible sensors and water-writing papers
Source: Royal Society of Chemistry journal article supplement (doi:10.1039/d3tc03889k), 2023-12-22
Supplement: d3tc03889k1.pdf [file d3tc03889k1.pdf]

## Supplementary Information

### Self-adaptive high-temperature gels with long-lasting underwater stability for environmentally tolerant flexible sensors and water-writing papers

Enke Feng,<sup>\*‡</sup> Xiaoqin Li,<sup>‡</sup> Zhongquan Yu,<sup>‡</sup> Zhiming Yang, Zhiqiang Wu,<sup>\*</sup> Mengzhen Zhang,

Qin Wang<sup>\*</sup>, and Xinxian Ma

*College of Chemistry and Chemical Engineering, Ningxia Normal University, GuYuan 756000, China.*

<sup>‡</sup>These authors contributed equally to this work. They should thus be considered co-first authors.

<sup>\*</sup>Corresponding authors: NXSFEKF@126.com (E, Feng); Wuzqnd@163.com (Z, Wu);

nxwangqin2018@163.com (Q, Wang).

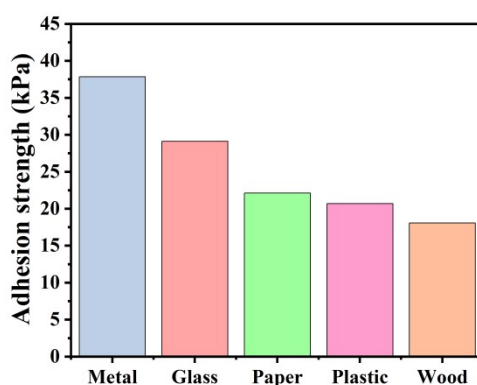

**Fig. S1** Adhesion strength of PEA-AA-MAm/IL gels on various substrates.

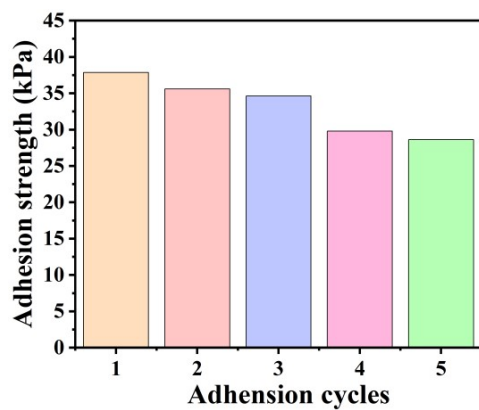

**Fig. S2** Cyclic adhesion strength of PEA-AA-MAm/IL gels on a metal (copper) substrate.

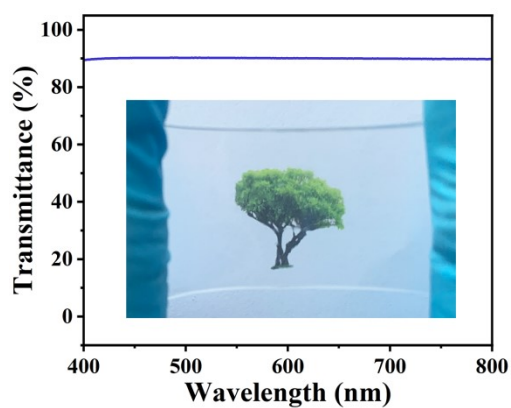

**Fig. S3** Visible light (400-800 nm) transmittance spectra of the PEA-AA-MAm/IL gel, and the inset displays its high transparency.

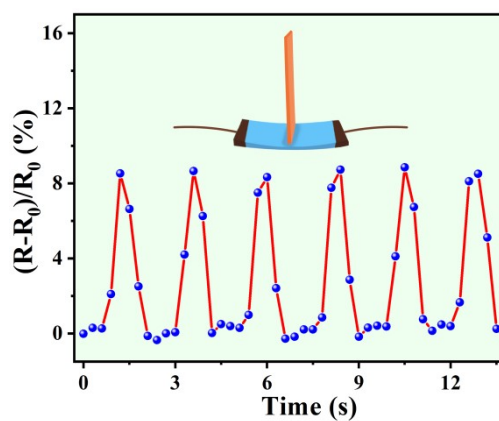

**Fig. S4** The electronic response signals of the PEA-AA-MAm/IL gel sensor for pressing deformation.

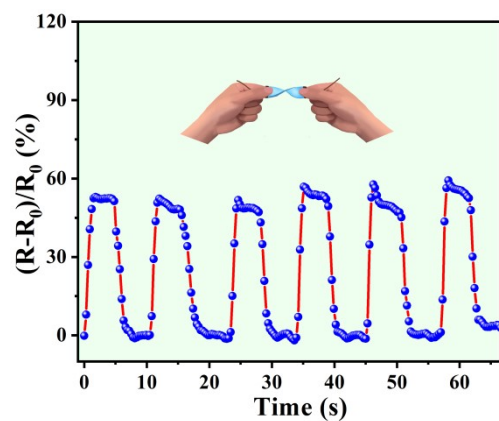

**Fig. S5** The electronic response signals of the PEA-AA-MAm/IL gel sensor for twisting deformation.

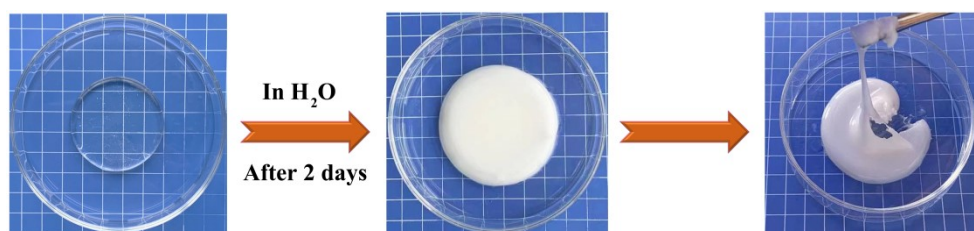

**Fig. S6** The swelling behavior of the AA-MAm/IL gel without PEA in water.

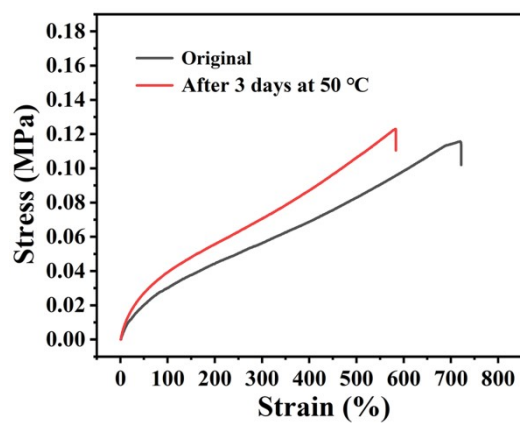

**Fig. S7** Tensile curves the PEA-AA-MAm/IL gel before and after being stored at 50 °C for 3 days.
